# Supplementary material for: Sex differences in emotional perception: Evidence from population of Tuvans (Southern Siberia)
Source: Frontiers journal article supplement (doi:10.3389/fpsyg.2022.924486), 2022-09-13
Supplement: Data_Sheet_1.PDF [file Data_Sheet_1.PDF]

# Supplementary materials

Table 1

| Mean Percentage Endorsement of Emotion Label by Face in Forced Choice Task |                   |        |          |                   |                  |               |               |               |         |         |
|----------------------------------------------------------------------------|-------------------|--------|----------|-------------------|------------------|---------------|---------------|---------------|---------|---------|
| Face ID                                                                    | Population origin | Gender | Set      | Emotion Portrayed | Emotion Endorsed |               |               |               |         |         |
|                                                                            |                   |        |          |                   | Anger            | Disguist      | Fear          | Happiness     | Sadness | Suprise |
| SMY                                                                        | Caucasian         | Male   | Faces    | Happiness         | 1.12%            | 4.08%         | 0.0%          | <b>92.86%</b> | 2.25%   | 0.0%    |
| SMY                                                                        | Caucasian         | Male   | Faces    | Disguist          | 0.0%             | <b>98.88%</b> | 0.0%          | 0.0%          | 0.0%    | 1.12%   |
| SMY                                                                        | Caucasian         | Male   | Faces    | Fear              | 1.12%            | 1.12%         | <b>46.5%</b>  | 0.0%          | 0.0%    | 51.18%  |
| SMY                                                                        | Caucasian         | Male   | Faces    | Anger             | <b>97.75%</b>    | 1.12%         | 1.12%         | 0.0%          | 0.0%    | 0.0%    |
| SME                                                                        | Caucasian         | Male   | Faces    | Happiness         | 0.0%             | 0.0%          | 0.0%          | <b>100.0%</b> | 0.0%    | 0.0%    |
| SME                                                                        | Caucasian         | Male   | Faces    | Disguist          | 0.0%             | <b>97.75%</b> | 2.25%         | 0.0%          | 0.0%    | 0.0%    |
| SME                                                                        | Caucasian         | Male   | Faces    | Fear              | 0.0%             | 1.12%         | <b>82.02%</b> | 0.0%          | 0.0%    | 16.85%  |
| SME                                                                        | Caucasian         | Male   | Faces    | Anger             | <b>82.02%</b>    | 11.24%        | 0.0%          | 0.0%          | 4.49%   | 2.25%   |
| SWY                                                                        | Caucasian         | Female | Faces    | Happiness         | 0.0%             | 0.0%          | 0.0%          | <b>100.0%</b> | 0.0%    | 0.0%    |
| SWY                                                                        | Caucasian         | Female | Faces    | Disguist          | 0.0%             | <b>89.89%</b> | 0.0%          | 0.0%          | 8.99%   | 1.12%   |
| SWY                                                                        | Caucasian         | Female | Faces    | Fear              | 1.12%            | 1.12%         | <b>65.17%</b> | 0.0%          | 0.0%    | 32.58%  |
| SWY                                                                        | Caucasian         | Female | Faces    | Anger             | <b>100.0%</b>    | 0.0%          | 0.0%          | 0.0%          | 0.0%    | 0.0%    |
| SWE                                                                        | Caucasian         | Female | Faces    | Happiness         | 0.0%             | 0.0%          | 0.0%          | <b>100.0%</b> | 0.0%    | 0.0%    |
| SWE                                                                        | Caucasian         | Female | Faces    | Disguist          | 0.0%             | <b>96.63%</b> | 0.0%          | 0.0%          | 3.37%   | 0.0%    |
| SWE                                                                        | Caucasian         | Female | Faces    | Fear              | 0.0%             | 3.37%         | <b>77.53%</b> | 0.0%          | 2.25%   | 16.85%  |
| SWE                                                                        | Caucasian         | Female | Faces    | Anger             | <b>47.19%</b>    | 8.99%         | 2.25%         | 2.25%         | 37.08%  | 2.25%   |
| TMY                                                                        | Mongolian         | Male   | our data | Happiness         | 0.0%             | 0.0%          | 0.0%          | <b>100.0%</b> | 0.0%    | 0.0%    |
| TMY                                                                        | Mongolian         | Male   | our data | Disguist          | 4.49%            | <b>82.02%</b> | 0.0%          | 0.0%          | 3.37%   | 10.11%  |
| TMY                                                                        | Mongolian         | Male   | our data | Fear              | 1.12%            | 2.25%         | <b>34.83%</b> | 0.0%          | 0.0%    | 59.55%  |
| TMY                                                                        | Mongolian         | Male   | our data | Anger             | <b>86.52%</b>    | 11.24%        | 0.0%          | 1.12%         | 1.12%   | 0.0%    |
| TME                                                                        | Mongolian         | Male   | our data | Happiness         | 1.12%            | 1.12%         | 0.0%          | <b>96.63%</b> | 1.12%   | 0.0%    |
| TME                                                                        | Mongolian         | Male   | our data | Disguist          | 0.0%             | <b>94.38%</b> | 0.0%          | 0.0%          | 4.49%   | 1.12%   |
| TME                                                                        | Mongolian         | Male   | our data | Fear              | 0.0%             | 0.0%          | 100.0%        | 0.0%          | 0.0%    | 0.0%    |
| TME                                                                        | Mongolian         | Male   | our data | Anger             | <b>88.76%</b>    | 3.37%         | 0.0%          | 0.0%          | 7.78%   | 0.0%    |
| TWE                                                                        | Mongolian         | Female | our data | Happiness         | 0.0%             | 0.0%          | 0.0%          | <b>100.0%</b> | 0.0%    | 0.0%    |
| TWE                                                                        | Mongolian         | Female | our data | Disguist          | 17.98%           | <b>77.53%</b> | 0.0%          | 0.0%          | 2.25%   | 2.25%   |
| TWE                                                                        | Mongolian         | Female | our data | Fear              | 1.12%            | 0.0%          | <b>98.88%</b> | 0.0%          | 0.0%    | 0.0%    |
| TWE                                                                        | Mongolian         | Female | our data | Anger             | <b>47.19%</b>    | 50.56%        | 0.0%          | 0.0%          | 2.25%   | 0.0%    |
| TWY                                                                        | Mongolian         | Female | our data | Happiness         | 0.0%             | 0.0%          | 0.0%          | <b>100.0%</b> | 0.0%    | 0.0%    |
| TWY                                                                        | Mongolian         | Female | our data | Disguist          | 0.0%             | <b>93.26%</b> | 0.0%          | 0.0%          | 6.74%   | 0.0%    |
| TWY                                                                        | Mongolian         | Female | our data | Fear              | 0.0%             | 5.62%         | <b>75.28%</b> | 0.0%          | 8.99%   | 10.11%  |
| TWY                                                                        | Mongolian         | Female | our data | Anger             | <b>83.15%</b>    | 5.62%         | 0.0%          | 0.0%          | 11.24%  | 0.0%    |

*Note.* Percentages represent the percent of participant that selected a given label as the best descriptor for a given face. Cells that are bolded reflect the percentage of participants who indicated that the face most clearly portrayed the intended emotion. Data were collected from 120 participants, 120 Moscow residents, aged 18-45. Each individual rated all 32 faces in a forced-choice task. Images of the original stimuli used can be provided upon request.

Table 2

| <b>Descriptions directly corresponding to intended emotions</b>                                |                                                                                                   |
|------------------------------------------------------------------------------------------------|---------------------------------------------------------------------------------------------------|
| <i>Happiness</i>                                                                               | happy, cheerful, joy, good mood, relief                                                           |
| <i>Disgust</i>                                                                                 | disgust, queasiness, squeamishness, stink                                                         |
| <i>Fear</i>                                                                                    | fear, fright, horror                                                                              |
| <i>Anger</i>                                                                                   | anger, the desire to scare and show strength, aggression, furiousness, irascibility               |
| <b>Other descriptions, which were not corresponding to intended discrete emotions directly</b> |                                                                                                   |
| <i>Surprise</i>                                                                                | shock, surprise                                                                                   |
| <i>Sadness</i>                                                                                 | sadness, resentment, frustration                                                                  |
| <i>Irritation</i>                                                                              | shyness, embarrassment                                                                            |
| <i>Pain</i>                                                                                    | headache                                                                                          |
| <i>Discontent</i>                                                                              | frowns, dissatisfied with something, disliked something, feeling unwell, negative mood            |
| <i>Incomprehension</i>                                                                         | lack of understanding: the model is just sitting/looking/thinking/photographing/ grimacing/ drunk |

Note. Only in those cases when perceiver was able to correctly guess the facial expression (to provide descriptions, which were directly corresponding to the intended emotion) the response variable was set to 1 (able to guess), in other cases it was set to 0 (not able to guess).
